# Supplementary material for: Development, Calibration and Performance of an HIV Transmission Model Incorporating Natural History and Behavioral Patterns: Application in South Africa
Source: PubMed Central journal article supplement (PMC4035281; doi:10.1371/journal.pone.0098272), 2014-05-27
Supplement: pone.0098272.s012.pdf [file pone.0098272.s012.pdf]

264,225 PARAMETER SETS

**PHASE 1: Behavior**  
32,769 PARAMETER SETS  
(12.4% of Original)

**Proportion in a Steady Partnership: 45.2% Pass Rate**  
**Proportion in Casual Partnerships: 57.7% Pass Rate**  
**Proportion in CSW Partnerships: 54.9% Pass Rate**  
**Proportion in Concurrent Partnerships: 74.3% Pass Rate**  
**Average Acts Per Person Per Month: 99.9% Pass Rate**  
**Casual Partnership Ratio (Females/Males): 98.6% Pass Rate**  
**Concurrent Partnership Ratio (Females/Males): 93.4% Pass Rate**  
**Ratio of Acts per Month (LR Females/HR Females): 98.2% Pass Rate**

**PHASE 2: HIV Prevalence/Shift**  
29,544 PARAMETER SETS  
(11.2% of Original)

**3,225** runs had slow starting epidemics and were discarded.

**PHASE 3: Behavior**  
3750 PARAMETER SETS  
(1.4% of Original)

**CSW HIV Prevalence: 48.1% Pass Rate**  
**HR Male HIV Prevalence: 49.4% Pass Rate**  
**HR Female HIV Prevalence: 57.3% Pass Rate**  
**LR Male HIV Prevalence: 100.0% Pass Rate**  
**LR Female HIV Prevalence: 89.4% Pass Rate**  
**CSW Acts per Month: 37.6% Pass Rate**  
**2-year HIV Incidence: 62.6% Pass Rate**
