# Supplementary material for: Development, Calibration and Performance of an HIV Transmission Model Incorporating Natural History and Behavioral Patterns: Application in South Africa
Source: PubMed Central journal article supplement (PMC4035281; doi:10.1371/journal.pone.0098272), 2014-05-27

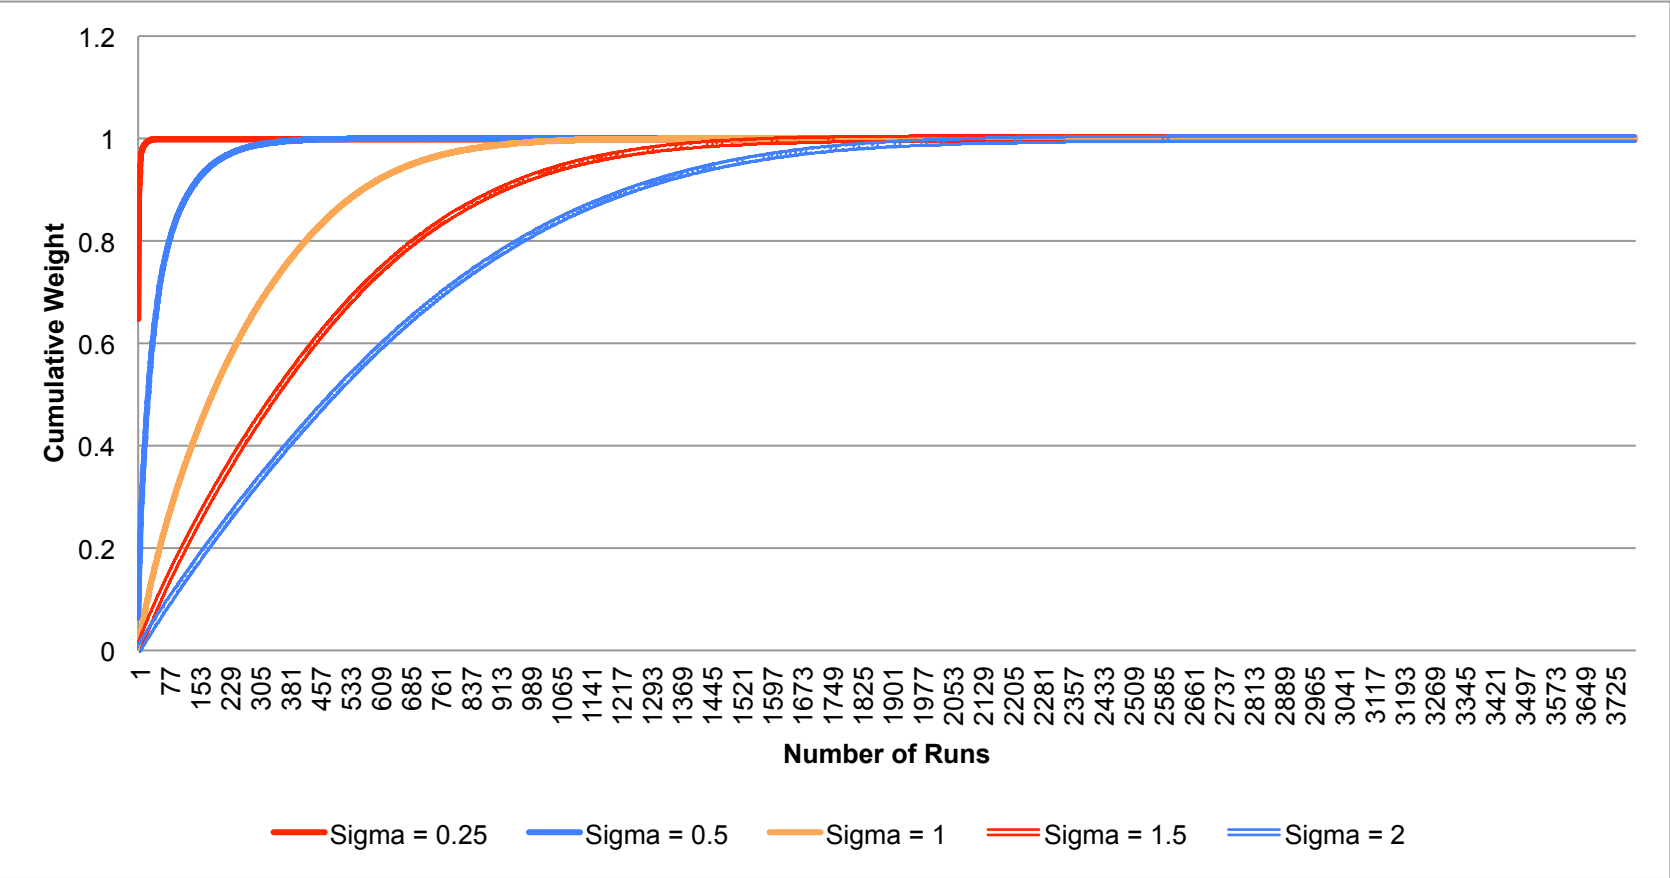

Supplement: pone.0098272.s013.pdf [file pone.0098272.s013.pdf]
