# Supplementary material for: Development, Calibration and Performance of an HIV Transmission Model Incorporating Natural History and Behavioral Patterns: Application in South Africa
Source: PubMed Central journal article supplement (PMC4035281; doi:10.1371/journal.pone.0098272), 2014-05-27
Supplement: pone.0098272.s014.pdf [file pone.0098272.s014.pdf]

## A. Assortativity

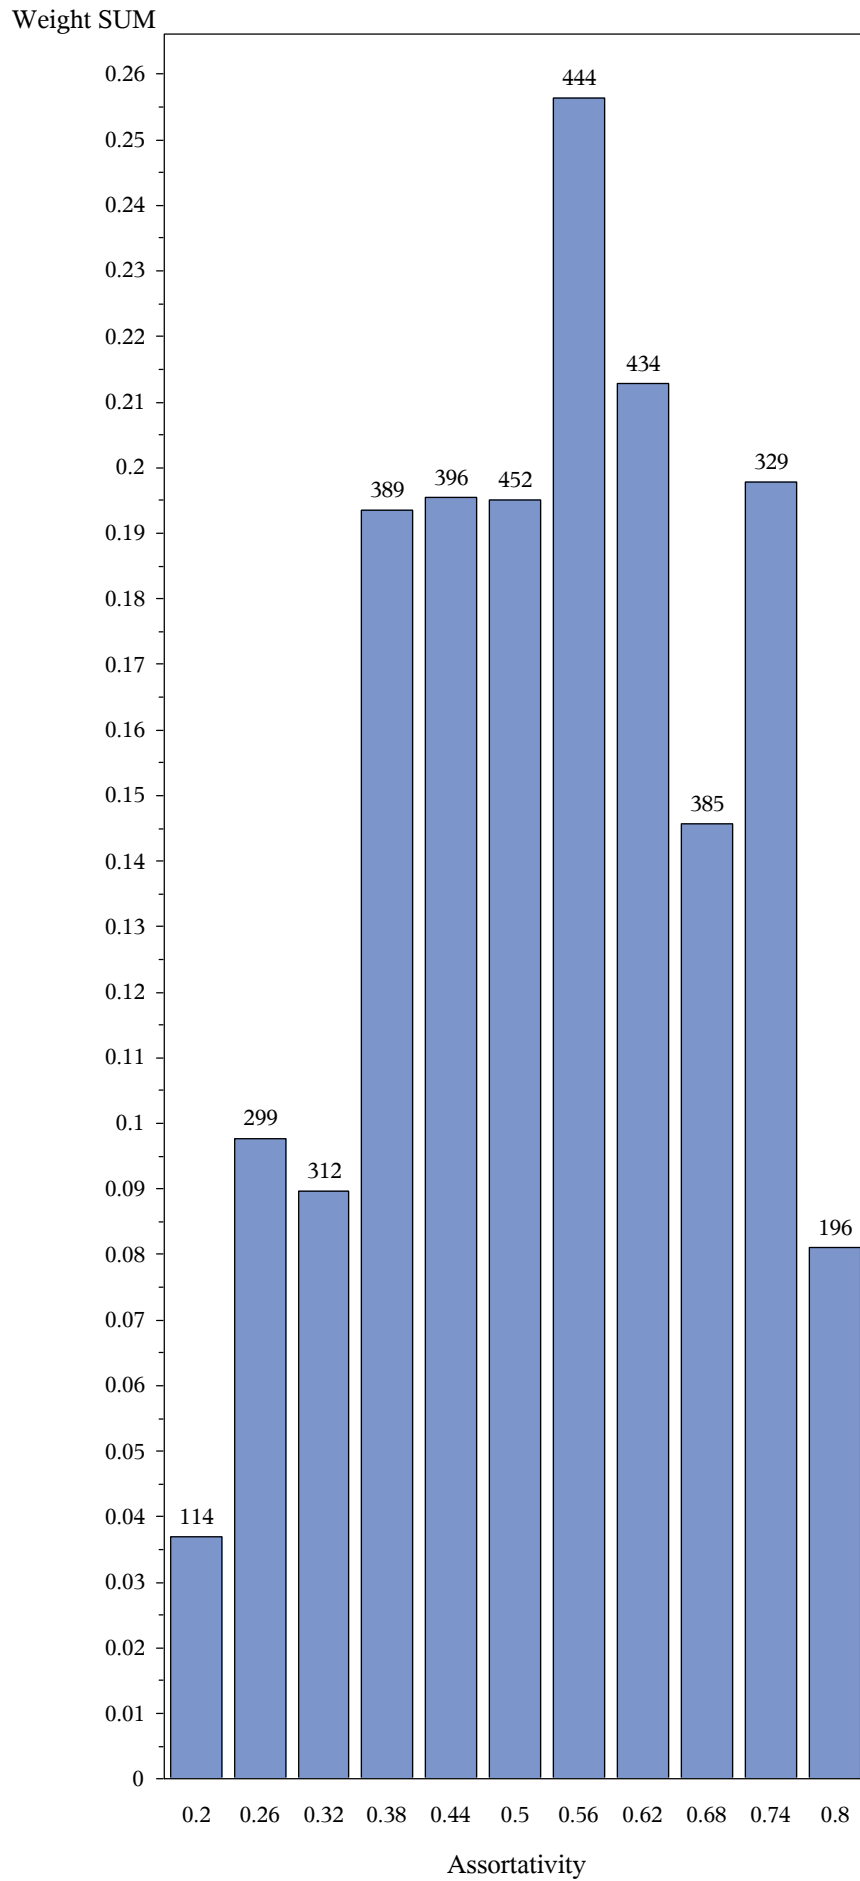

## B. Number of Sexual Acts per Regular Partnership per Month

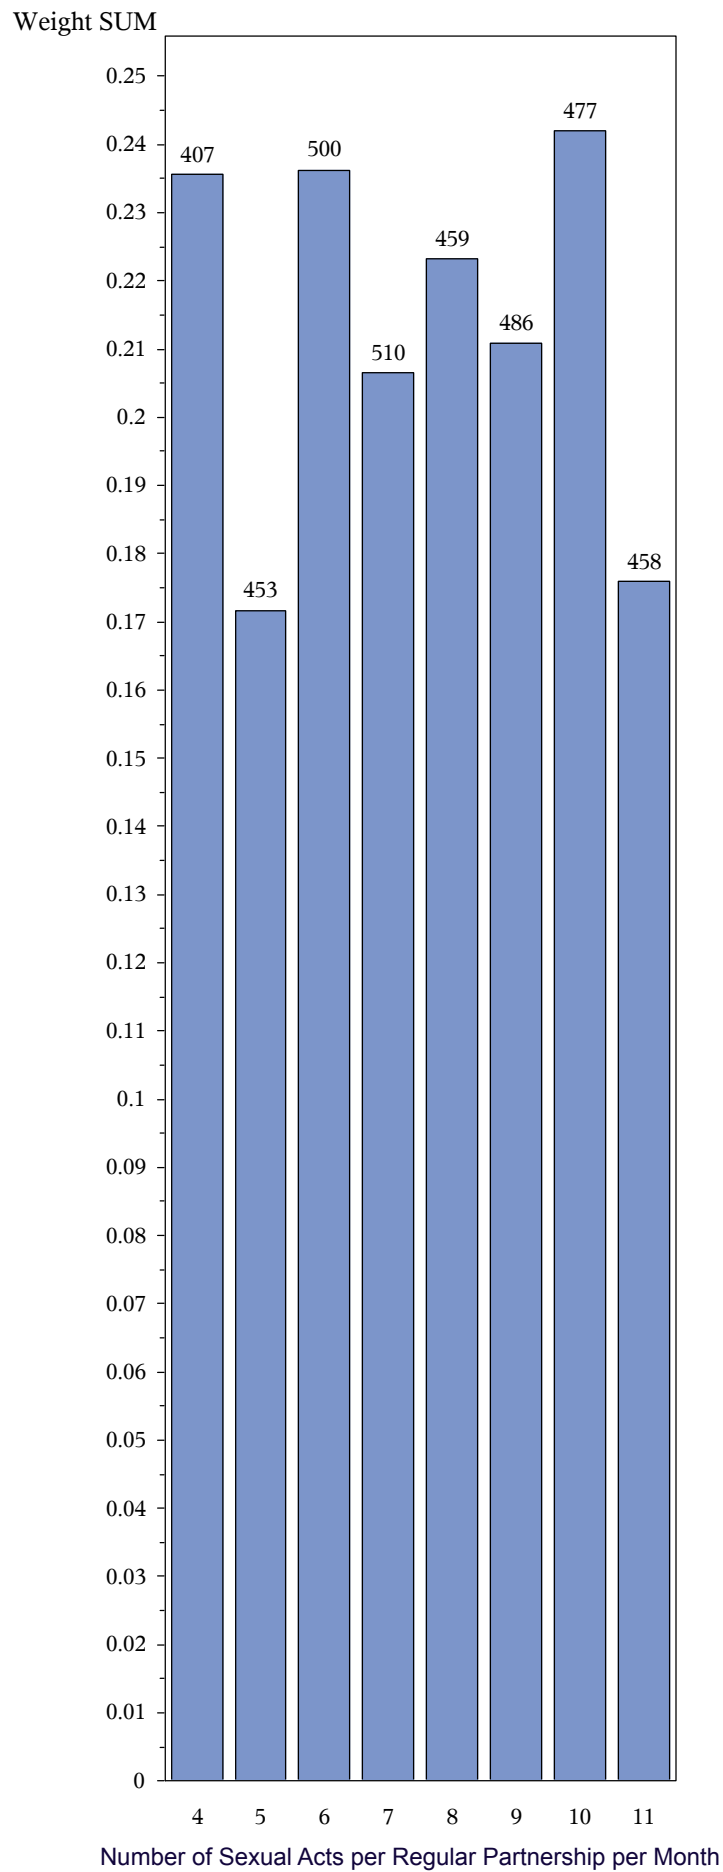

### C. Chance of a Female Becoming a CSW

Weight SUM

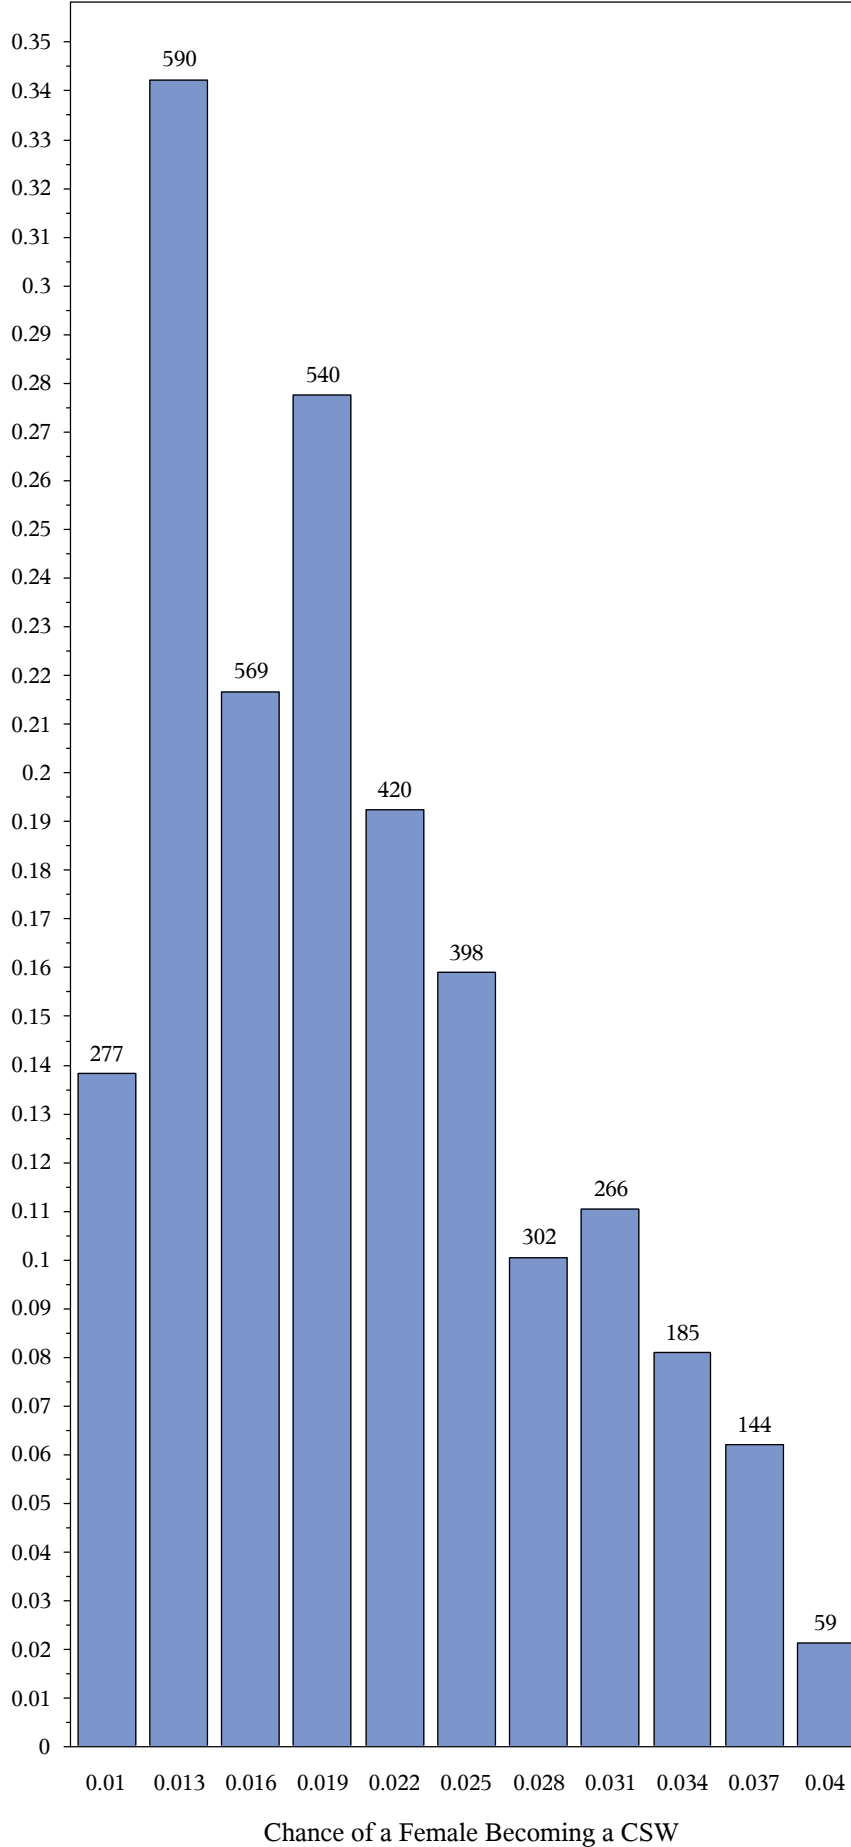

### D. Proportion of Males in the HR Group

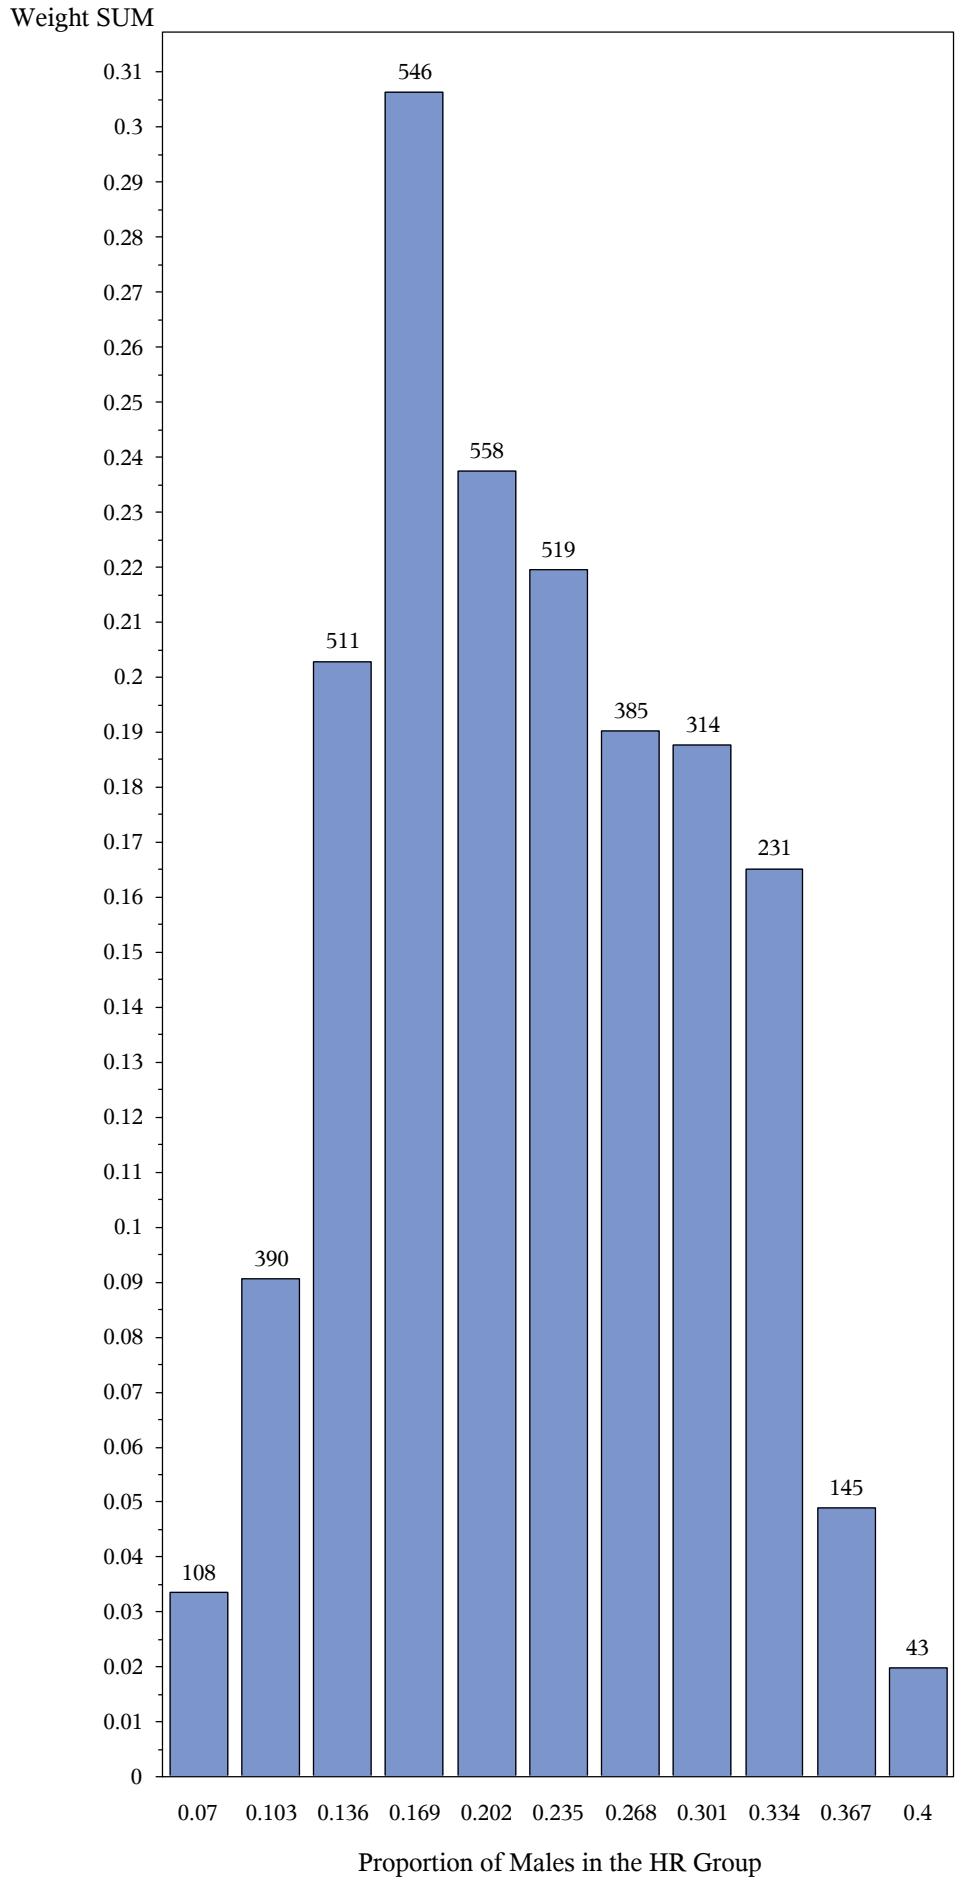

## E. Proportion of Non-CSW Females in the HR Group

Weight SUM

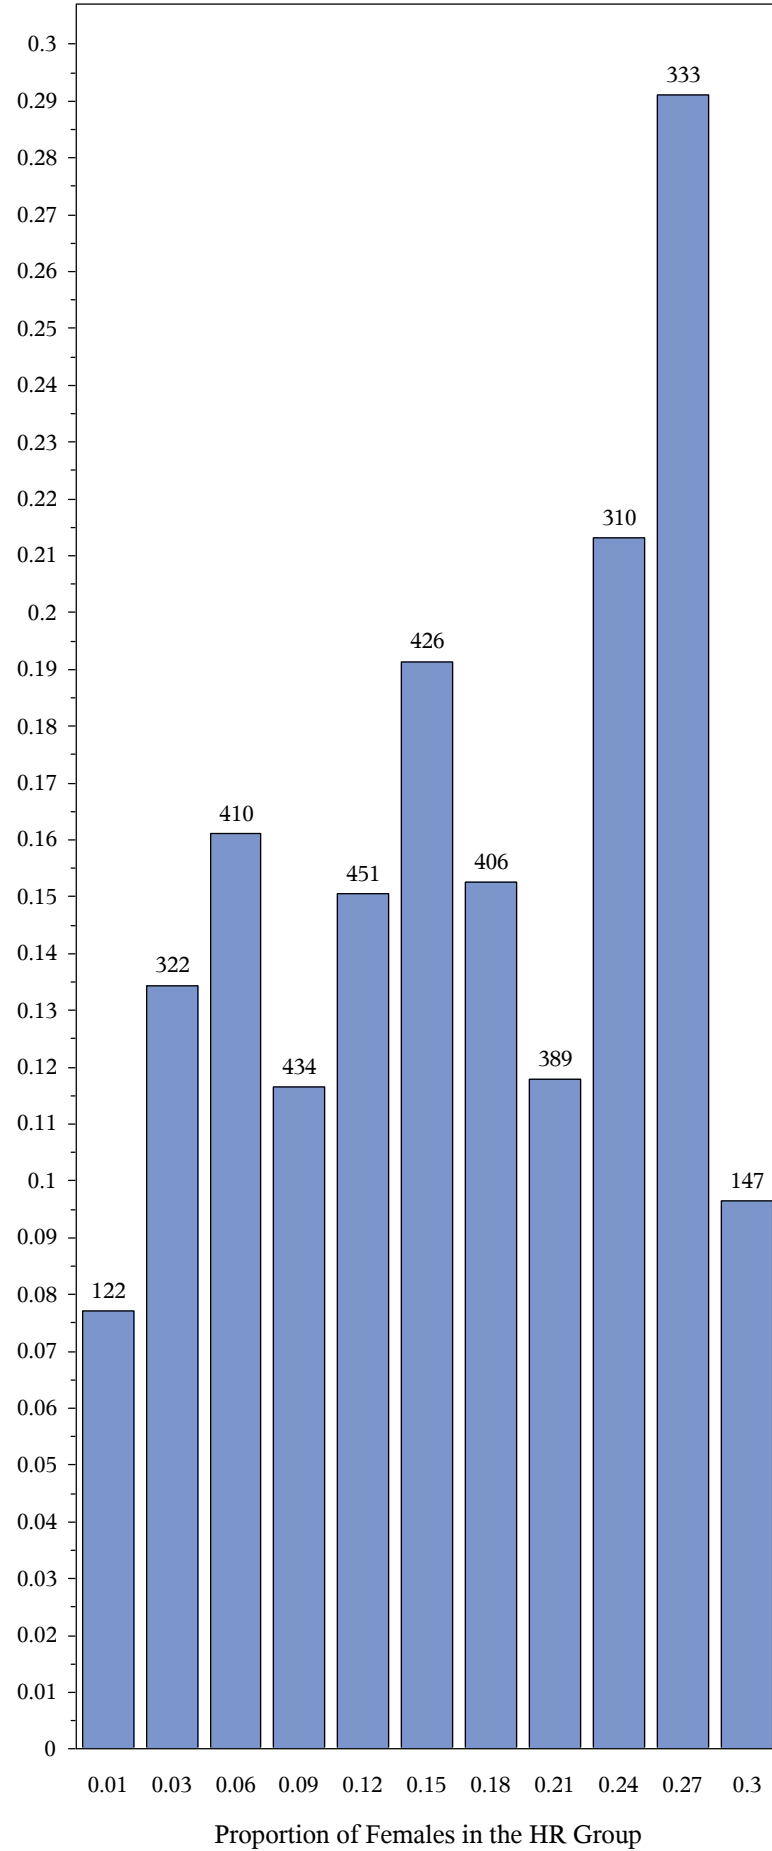

## F. Partner Acquisition Rate Multiplier (Epsilon)

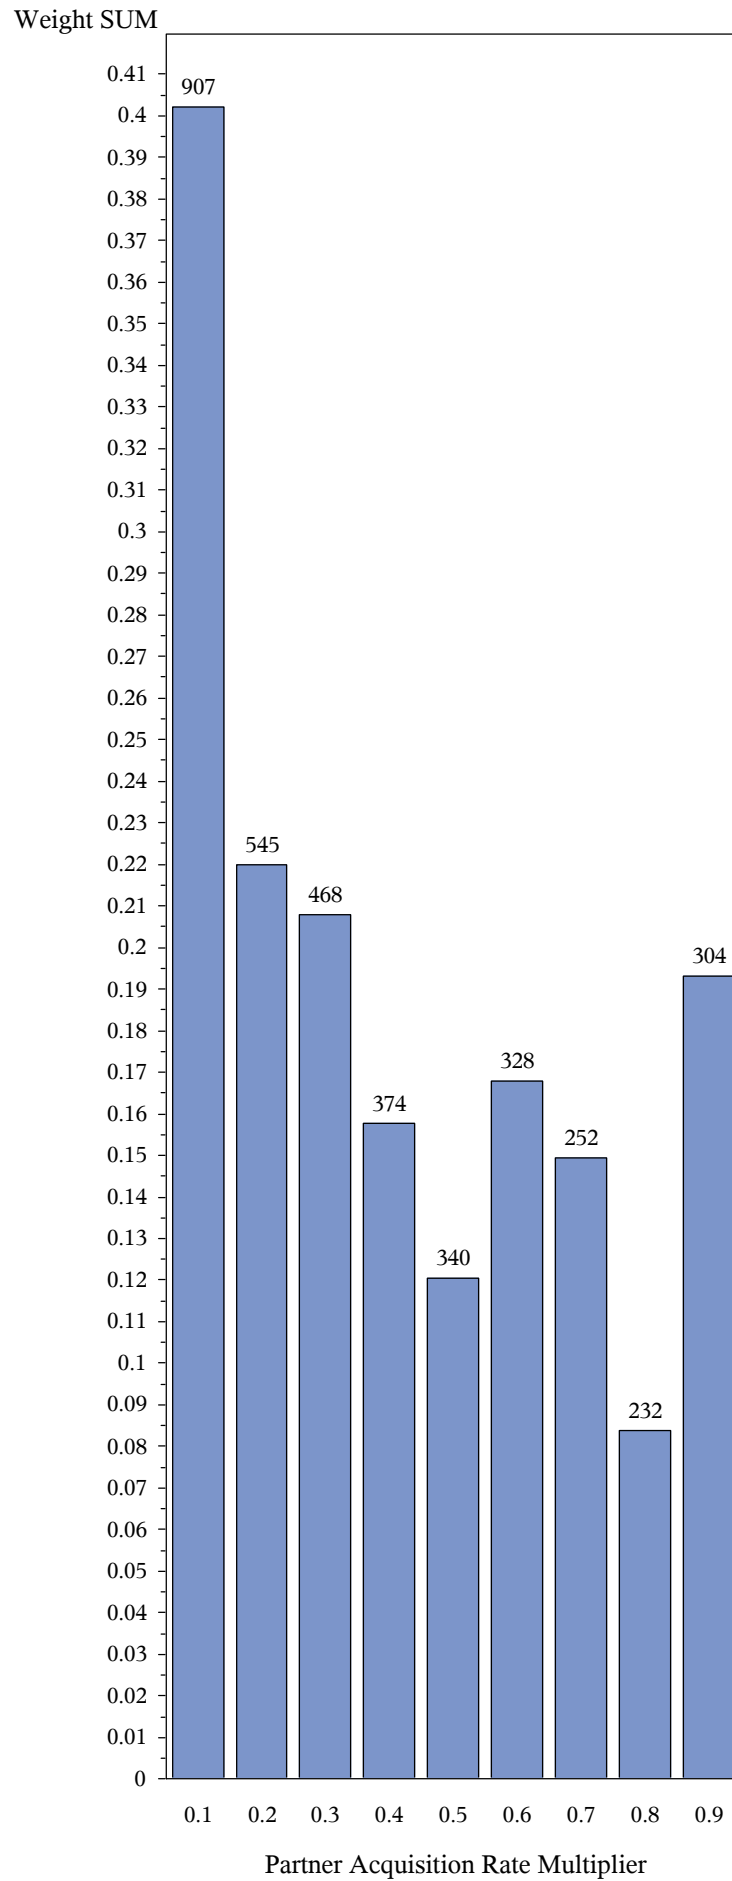

# G. HR Multiplier

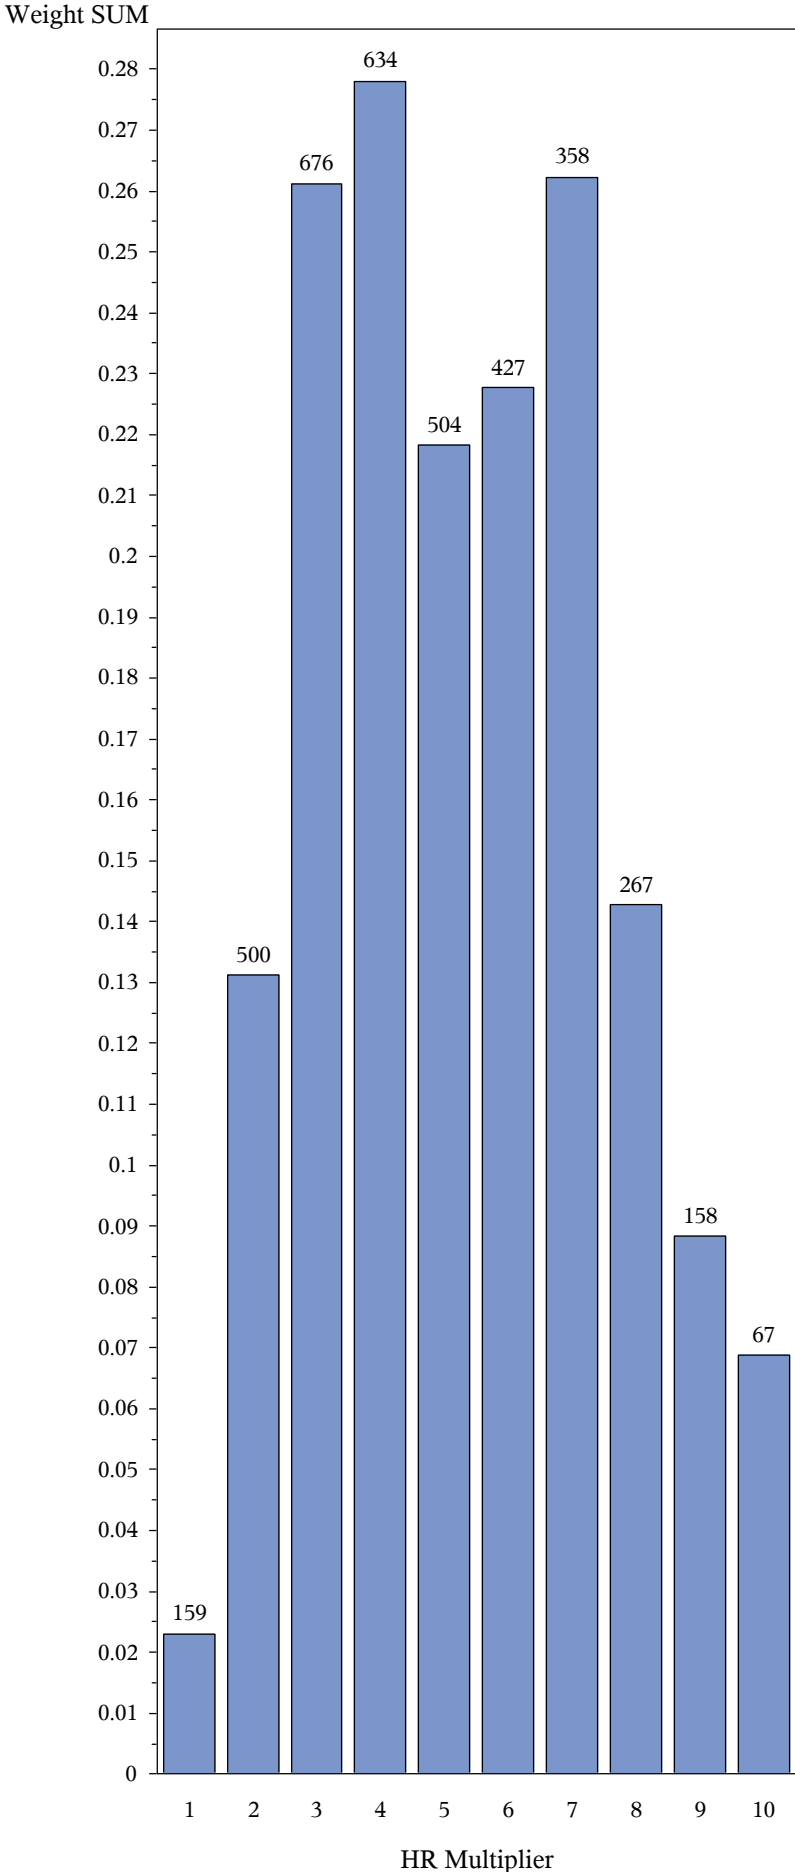

## H. CSW Multiplier

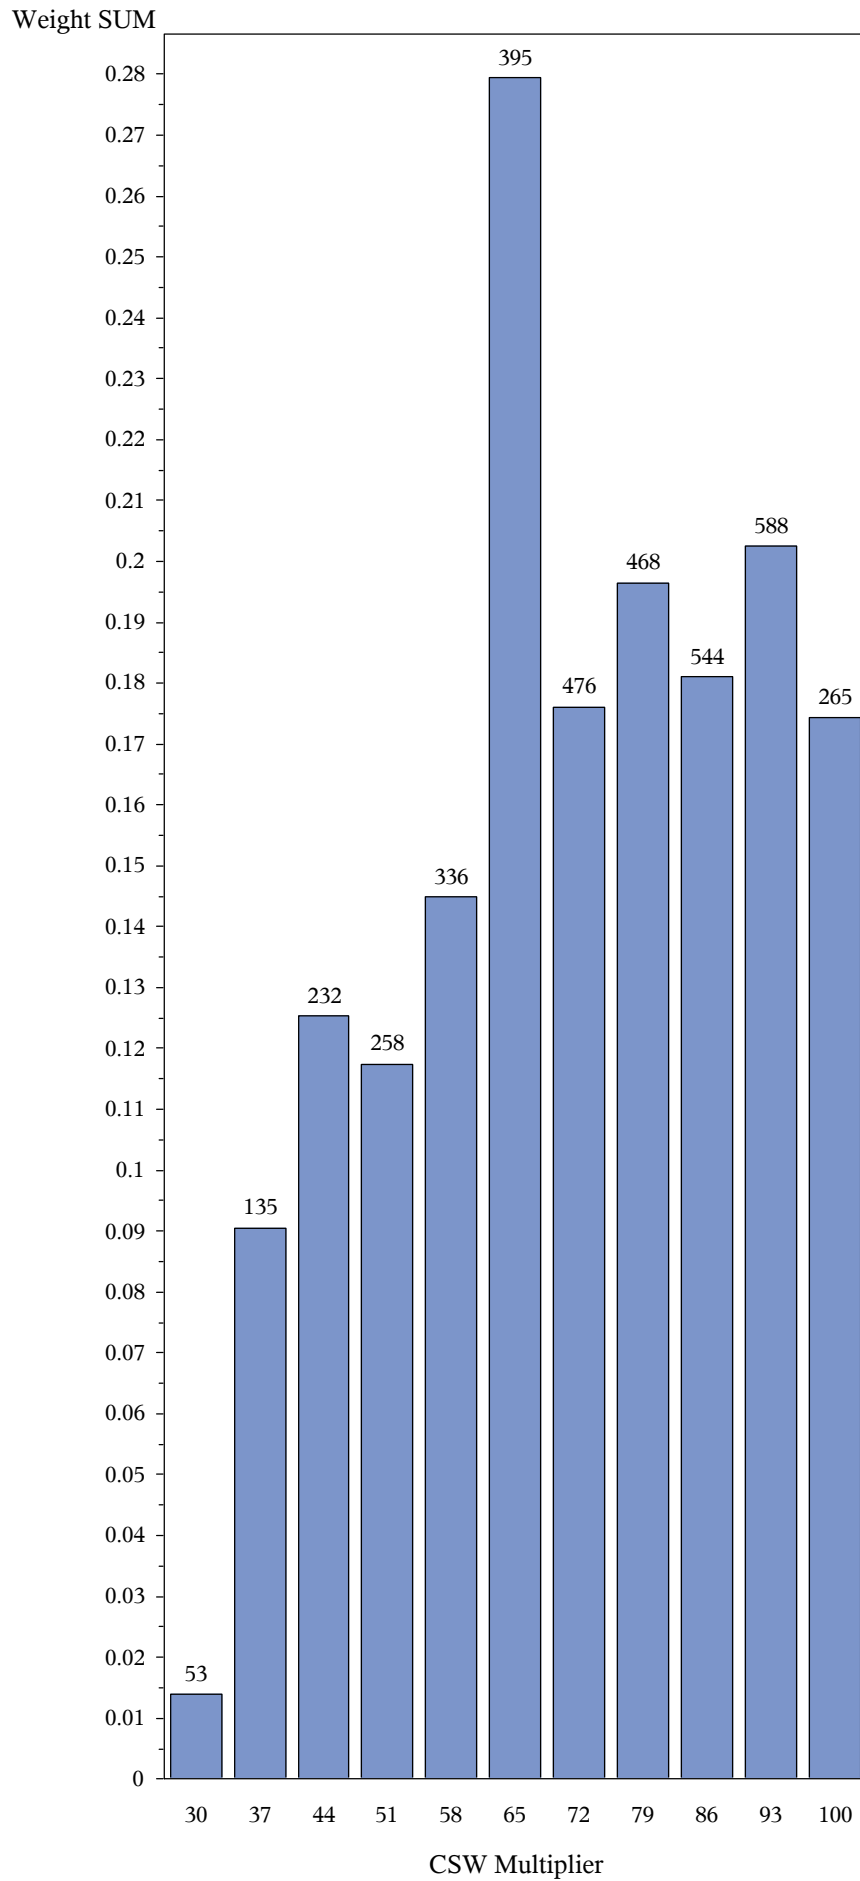



# I. Monthly Acquisition Rate for Steady Partnerships for LR Males

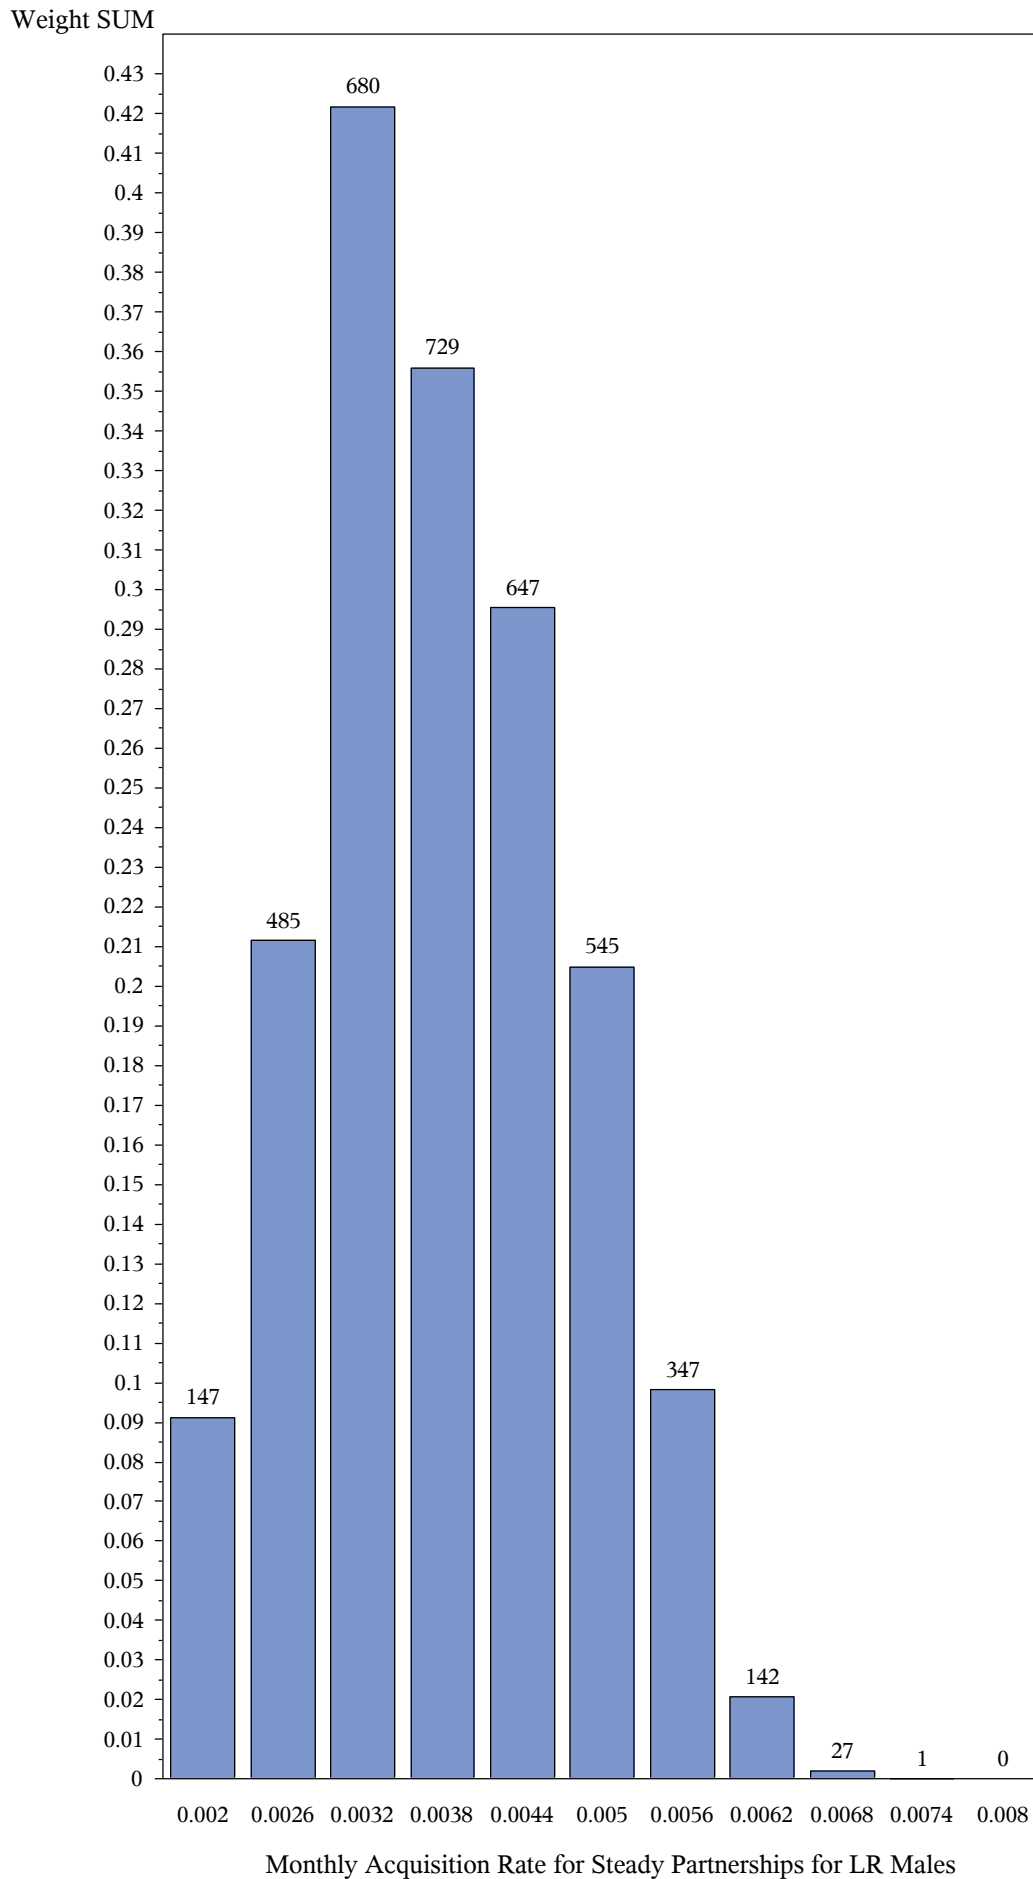

# J. Monthly Acquisition Rate for Regular Partnerships for LR Males

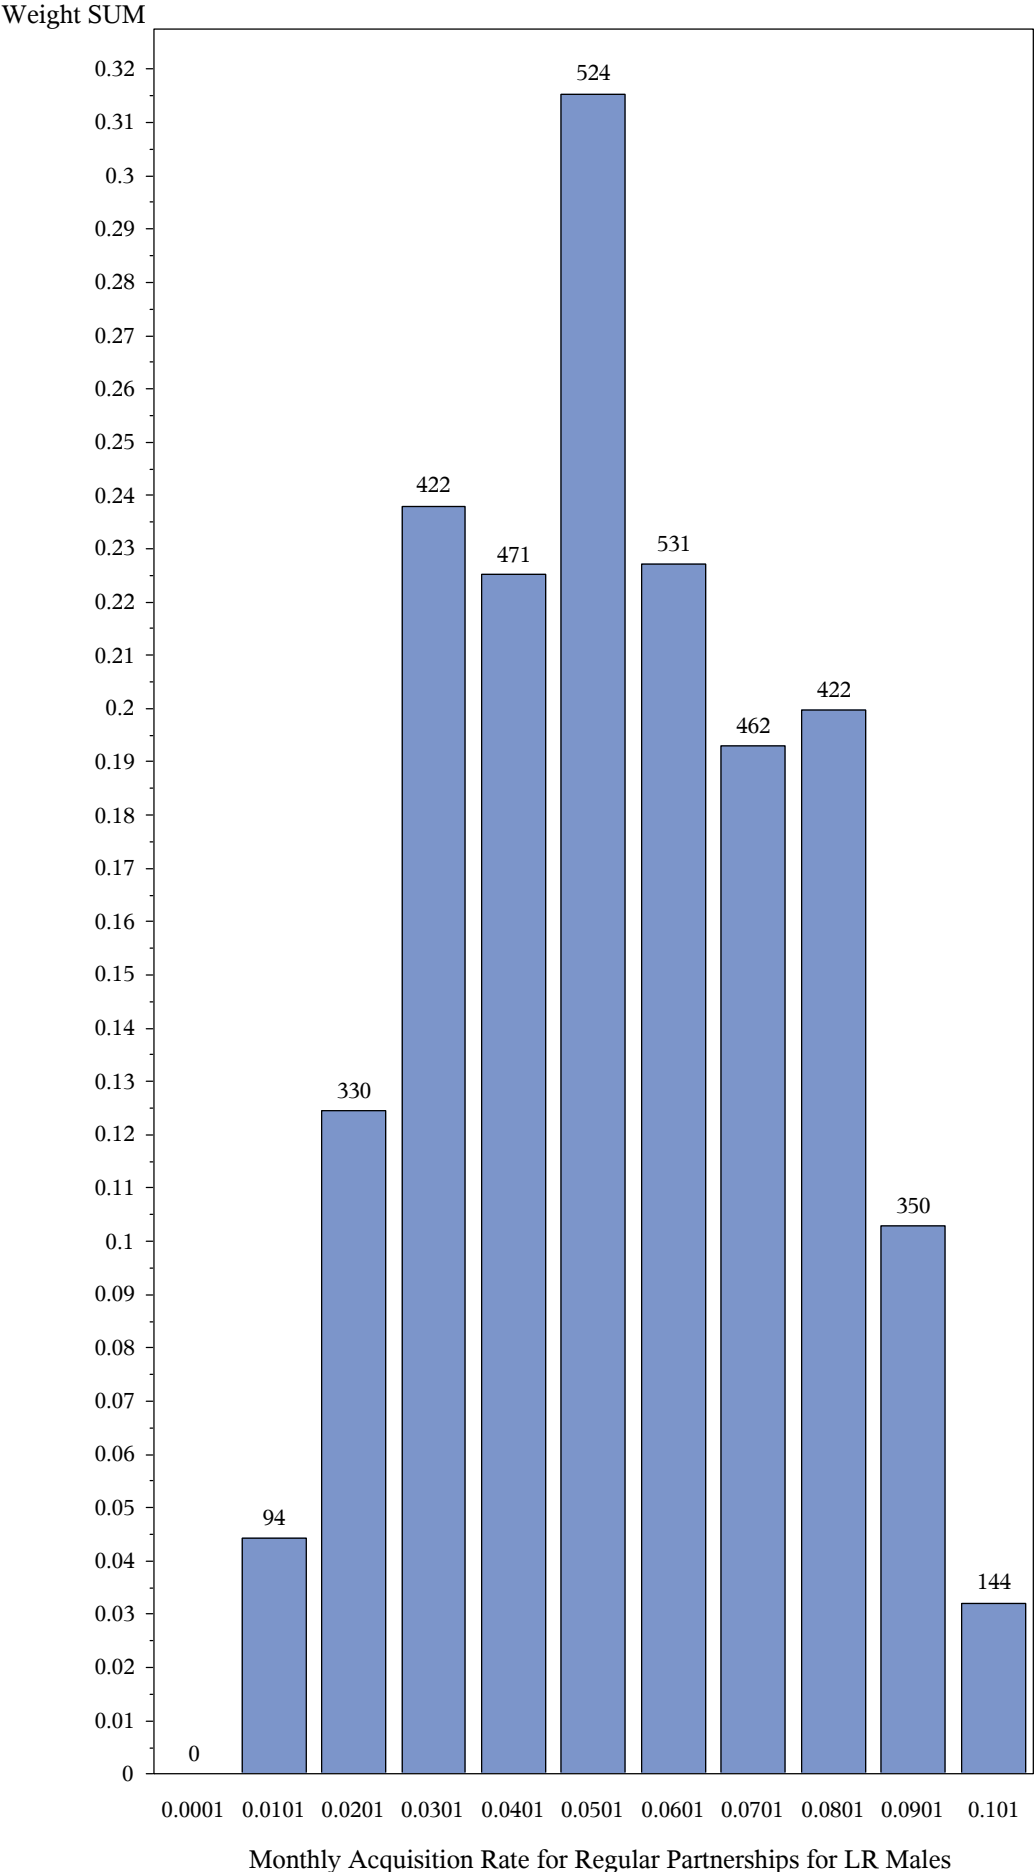

## K. Monthly Acquisition Rate for Casual Partnerships for LR Males

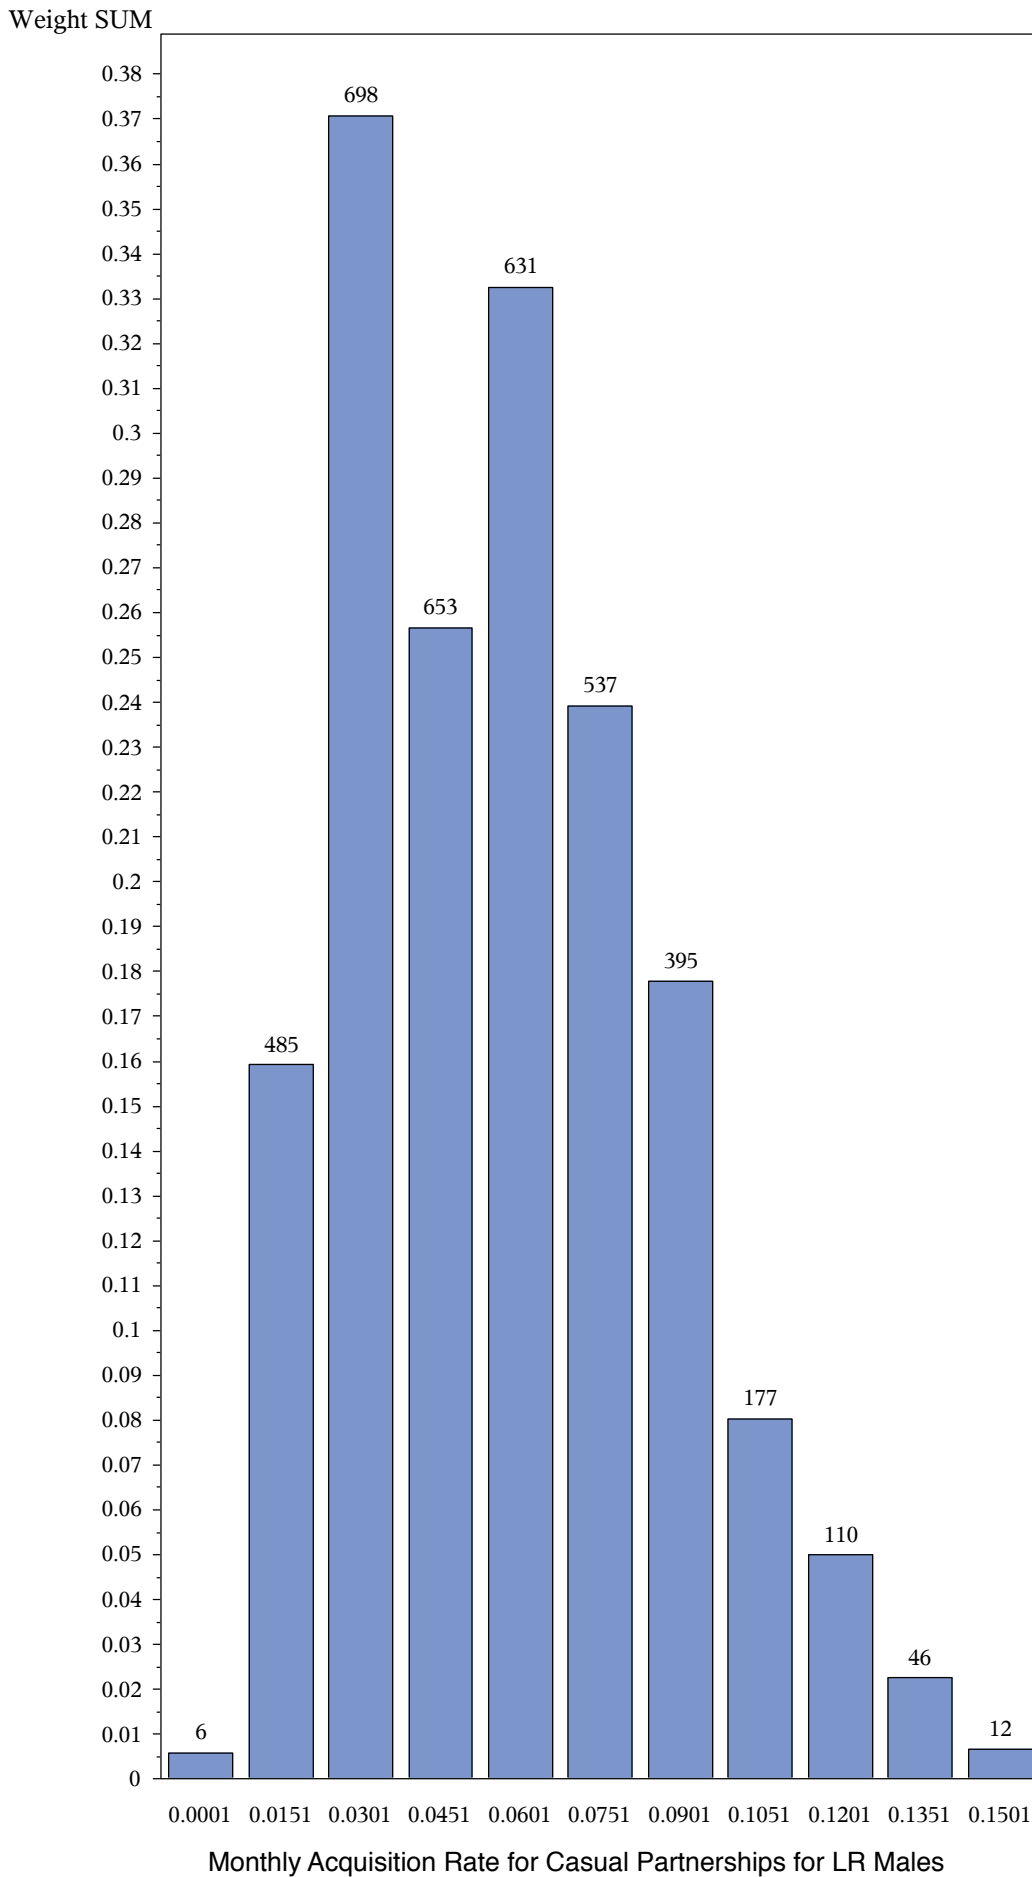

## L. Monthly Acquisition Rate for CSW Partnerships for LR Males

Weight SUM

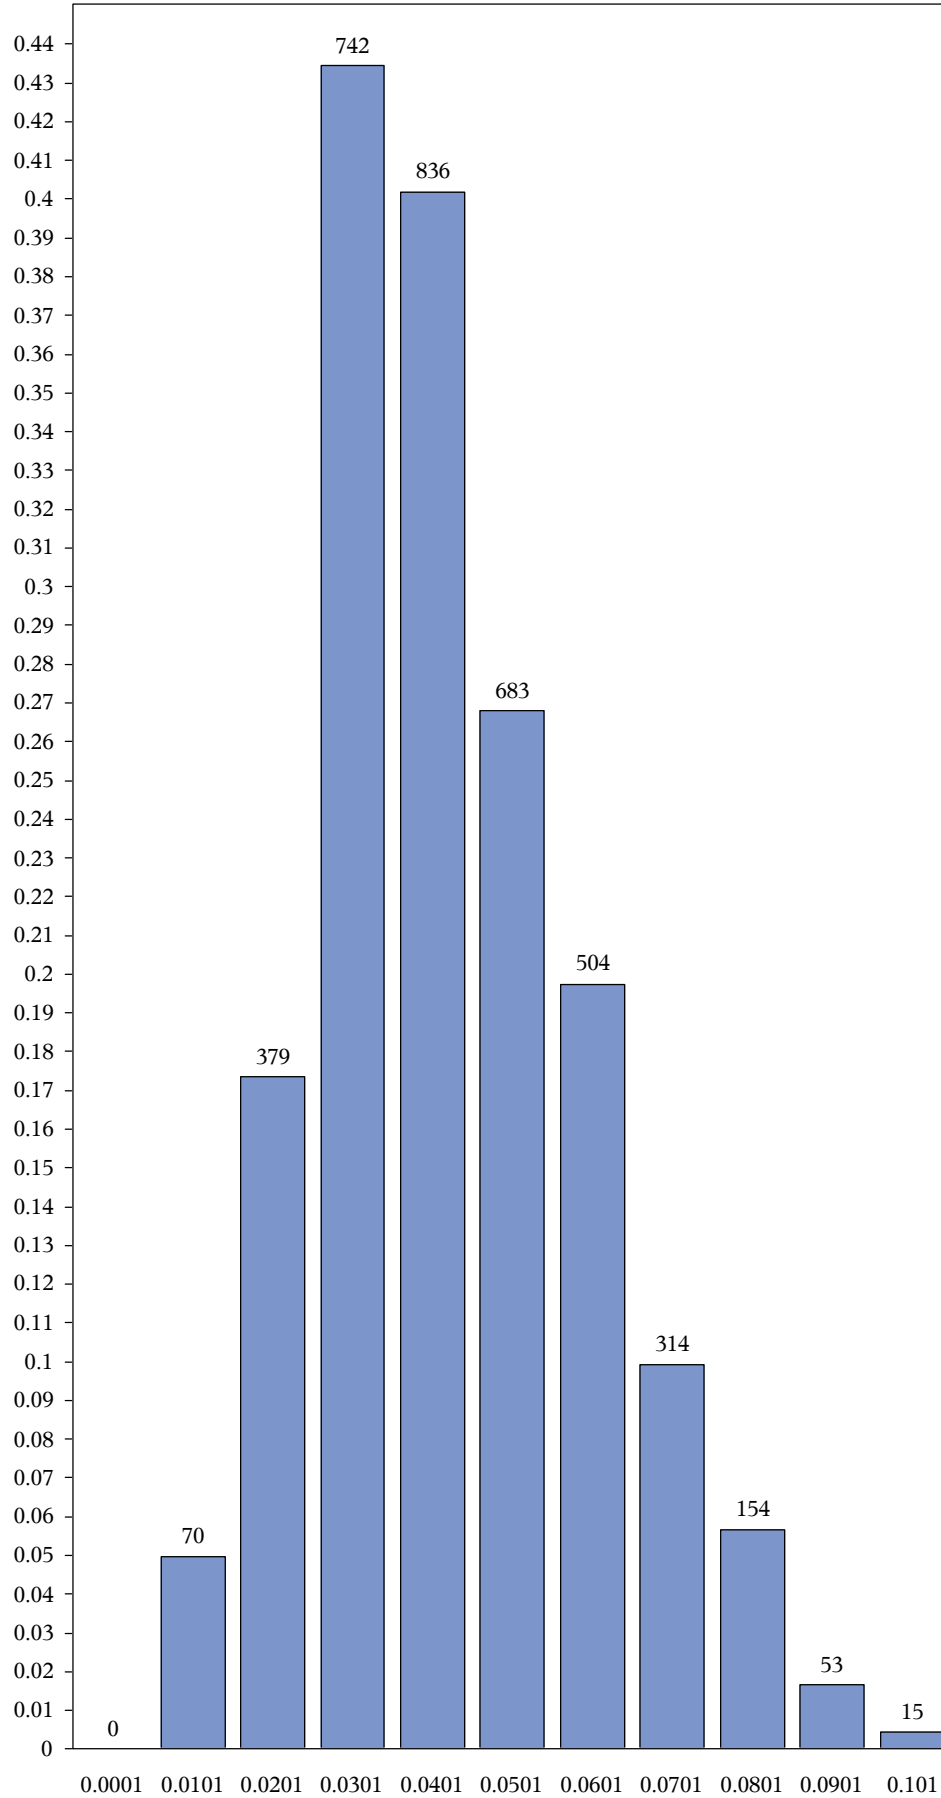

Monthly Acquisition Rate for CSW Partnerships for LR Males
